# Supplementary material for: Integration of In Silico Strategies for Drug Repositioning towards P38α Mitogen-Activated Protein Kinase (MAPK) at the Allosteric Site
Source: MDPI journal article supplement (doi:10.3390/pharmaceutics14071461), 2022-07-13
Supplement: s1 [file s1]

## Supplementary Materials: Integration of *In Silico* Strategies for Drug Repositioning towards P38 $\alpha$ Mitogen-Activated Protein Kinase (MAPK) at the Allosteric Site

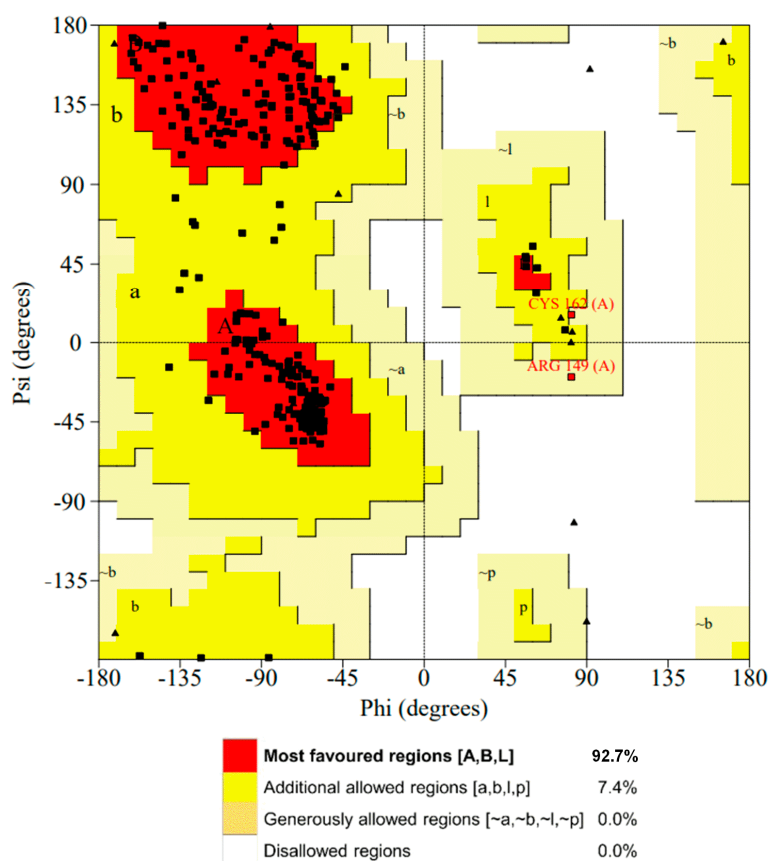

**Figure S1:** Ramachandran plot analysis of a homologically constructed protein structure where the torsional conformation of amino acids was plotted. Most of them were fallen into favoured/allowed regions, which signify an acceptable quality of constructed model.

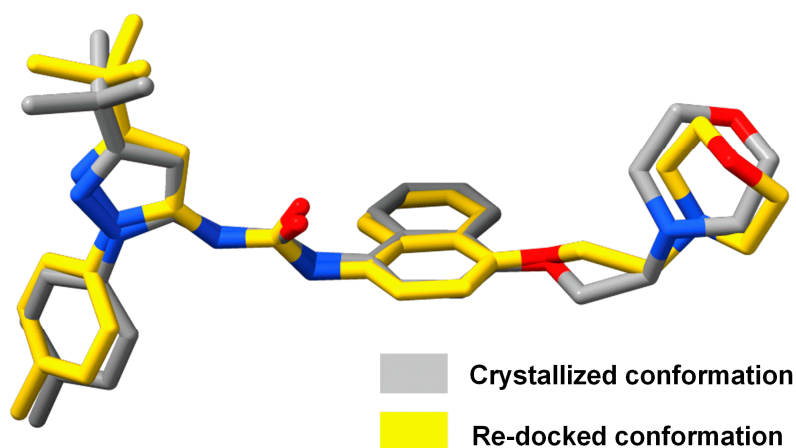

**Figure S2:** Alignment of the re-docked pose and available crystallized ligand (BIRB796) of p38α MAPK indicating a verified docking protocol used in this study.

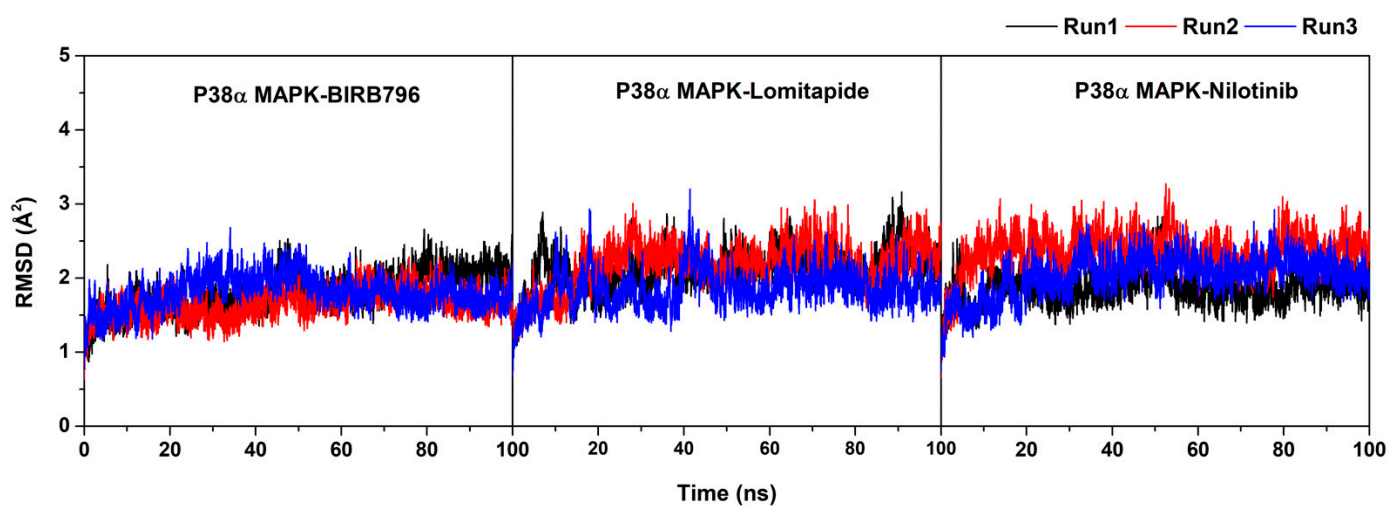

**Figure S3:** Plot of root-mean-square displacement (RMSD) for the backbone amino acids within 5 Å from the ligand. The data were illustrated in three independent runs with different initial velocities.

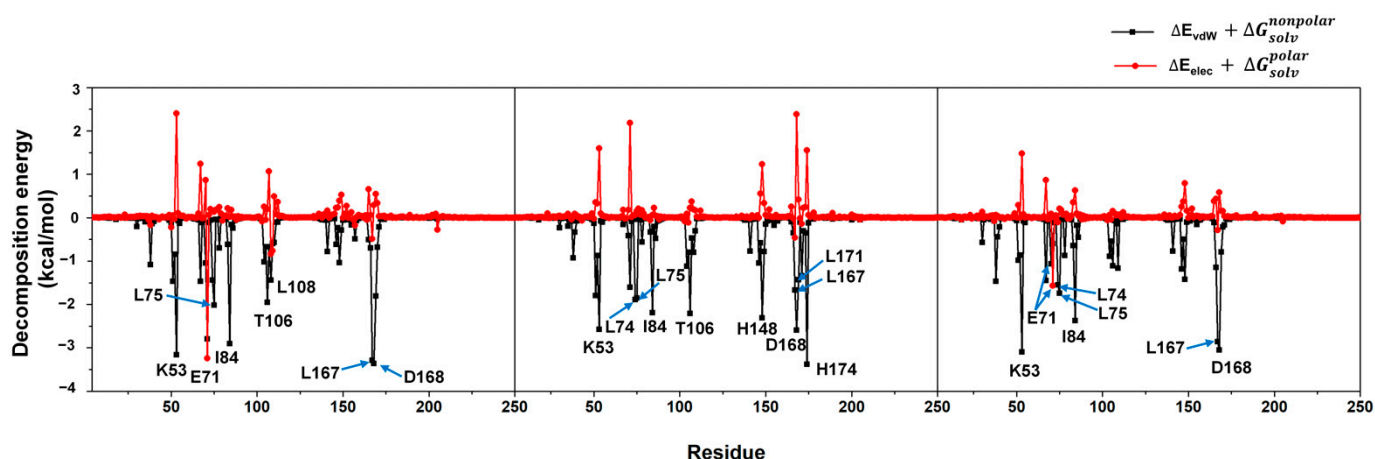

**Figure S4:** Analysis of per-residue VdW ( $\Delta E_{\text{vdW}} + \Delta G_{\text{sol}}^{\text{nonpolar}}$ ) and electrostatic ( $\Delta E_{\text{elec}} + \Delta G_{\text{sol}}^{\text{polar}}$ ) decomposition energy in which the amino acids largely contributed via VdW and electrostatic interaction energies were labeled in a one-letter code format. We noted that even though some residues (e.g. K53, H148) were noticeably stabilized through vdW interactions, they did not play a role in the binding process since they were destabilized by electrostatic charge-charge repulsion (as observed in positive electrostatic energy). Hence, these kinds of residues were not shown in the article Figure 6.

**Table S1:** Summary of key pharmacophore features of BIRB796, lomitapide, and nilotinib detected by using the PharmaGist web interface.

| Compounds  | Total<br>Features | Aromatic<br>moiety | Hydrophobic<br>moiety | H-bond<br>donor | H-bond<br>acceptor |
|------------|-------------------|--------------------|-----------------------|-----------------|--------------------|
| BIRB796    | 20                | 4                  | 8                     | 2               | 5                  |
| Lomitapide | 11                | 4                  | 2                     | 2               | 3                  |
| Nilotinib  | 16                | 5                  | 3                     | 4               | 4                  |

**Table S2:** The  $\Delta G_{\text{bind}}$  value (kcal/mol) in each run and the averaged  $\Delta G_{\text{bind}}$  of the two focused drug candidates and BIRB796 in complex with p38 $\alpha$  MAPK. The calculations in three independent runs of each complex showed a similar range of  $\Delta G_{\text{bind}}$  value, indicating the reproducibility of end-point SIE prediction of the binding affinity. We noted that the  $\Delta G_{\text{bind}}$  listed in Table 1 were from the first run since we kept them consistent with the other eight remaining drug candidates.

| Compounds  | Run            | Energy Components (kcal/mol) |                   |                        |                            |                                   |
|------------|----------------|------------------------------|-------------------|------------------------|----------------------------|-----------------------------------|
|            |                | $E_{\text{vdw}}$             | $E_{\text{coul}}$ | $\Delta G_{\text{RF}}$ | $\Delta G_{\text{cavity}}$ | $\Delta G_{\text{bind}}$          |
| BIRB796    | 1              | -78.53 $\pm$ 0.29            | -9.93 $\pm$ 0.15  | 15.60 $\pm$ 0.20       | -13.63 $\pm$ 0.04          | -11.95 $\pm$ 0.04                 |
|            | 2              | -82.37 $\pm$ 0.28            | -10.85 $\pm$ 0.14 | 15.07 $\pm$ 0.20       | -13.91 $\pm$ 0.04          | -11.64 $\pm$ 0.03                 |
|            | 3              | -82.01 $\pm$ 0.32            | -8.32 $\pm$ 0.16  | 11.41 $\pm$ 0.19       | -13.58 $\pm$ 0.04          | -11.69 $\pm$ 0.04                 |
|            | <i>Average</i> |                              |                   |                        |                            | <b>-11.76<math>\pm</math>0.04</b> |
| Lomitapide | 1              | -77.77 $\pm$ 0.39            | -5.95 $\pm$ 0.18  | 17.01 $\pm$ 0.24       | -14.43 $\pm$ 0.04          | -11.39 $\pm$ 0.05                 |
|            | 2              | -78.41 $\pm$ 0.34            | -13.12 $\pm$ 0.19 | 29.61 $\pm$ 0.35       | -14.58 $\pm$ 0.06          | -10.90 $\pm$ 0.04                 |
|            | 3              | -81.79 $\pm$ 0.34            | -6.11 $\pm$ 0.18  | 16.21 $\pm$ 0.24       | -13.16 $\pm$ 0.04          | -11.78 $\pm$ 0.04                 |
|            | <i>Average</i> |                              |                   |                        |                            | <b>-11.35<math>\pm</math>0.04</b> |
| Nilotinib  | 1              | -69.53 $\pm$ 0.35            | -13.04 $\pm$ 0.17 | 15.54 $\pm$ 0.19       | -12.35 $\pm$ 0.03          | -11.21 $\pm$ 0.04                 |
|            | 2              | -70.47 $\pm$ 0.37            | -11.71 $\pm$ 0.24 | 14.87 $\pm$ 0.15       | -12.56 $\pm$ 0.04          | -11.26 $\pm$ 0.03                 |
|            | 3              | -68.62 $\pm$ 0.35            | -15.35 $\pm$ 0.21 | 17.51 $\pm$ 0.18       | -12.67 $\pm$ 0.04          | -11.18 $\pm$ 0.04                 |
|            | <i>Average</i> |                              |                   |                        |                            | <b>-11.21<math>\pm</math>0.04</b> |

**Table S3:** The  $\Delta G_{\text{bind}}$  value (kcal/mol) of the modified structure of lomitapide in complex with p38 $\alpha$  MAPK, calculated by using end-point SIE method.

| Drugs               | Energy Components (kcal/mol) |                   |                        |                            |                          |
|---------------------|------------------------------|-------------------|------------------------|----------------------------|--------------------------|
|                     | $E_{\text{vdw}}$             | $E_{\text{coul}}$ | $\Delta G_{\text{RF}}$ | $\Delta G_{\text{cavity}}$ | $\Delta G_{\text{bind}}$ |
| Modified lomitapide | -85.37 $\pm$ 0.46            | -11.92 $\pm$ 0.34 | 23.39 $\pm$ 0.30       | -14.48 $\pm$ 0.06          | -12.15 $\pm$ 0.06        |
